# Supplementary material for: Cell Sorting-Directed Selection of Bacterial Cells in Bigger Sizes Analyzed by Imaging Flow Cytometry during Experimental Evolution
Source: MDPI journal article supplement (doi:10.3390/ijms24043243), 2023-02-07
Supplement: s1 [file s1]

**Table S1 Genome mutations found in the six experimental samples.** The names, chromosomal position, changes in nucleotides and amino acids, and functions of genes with the detected mutations are indicated.

| Samples          | Gene name              | Essentiality | Genome position | Change in DNA | Frequency | Change in AA | Mutant Position in AA | Domain                   | Pfam                                                                                  | Function                                                                                                                                                |
|------------------|------------------------|--------------|-----------------|---------------|-----------|--------------|-----------------------|--------------------------|---------------------------------------------------------------------------------------|---------------------------------------------------------------------------------------------------------------------------------------------------------|
| <b>MDS42 T2</b>  |                        |              |                 |               |           |              | Reference genome      |                          |                                                                                       |                                                                                                                                                         |
| <b>FACS-A</b>    | <i>rpoB</i>            | Essential    | 3612978         | C→A           | 79.03%    | Arg→Ser      | p.Arg841Ser           | RNA_pol_Rpb2_6(717-1264) | <a href="http://pfam.xfam.org/protein/P0A8V2">http://pfam.xfam.org/protein/P0A8V2</a> | DNA-dependent RNA polymerase (RNAP) catalyzes the transcription of DNA into RNA using the four ribonucleoside triphosphates as substrates               |
| <b>FACS-B</b>    | <i>amiC</i>            | No essential | 2458402         | C→A           | 99.31%    | Glu→*        | p.Glu382*             | Amidase_3(190-405)       | <a href="http://pfam.xfam.org/protein/P63883">http://pfam.xfam.org/protein/P63883</a> | Cell-wall hydrolase involved in septum cleavage during cell division. Can also act as powerful autolysin in the presence of murein synthesis inhibitors |
| <b>FACS-C</b>    |                        |              |                 |               |           |              | No mutation found     |                          |                                                                                       |                                                                                                                                                         |
| <b>Control-A</b> |                        |              |                 |               |           |              | No mutation found     |                          |                                                                                       |                                                                                                                                                         |
| <b>Control-B</b> | <i>ECMDS42_RS05710</i> | No essential | 1178583         | G→C           | 20.64%    | Val→Leu      | p.Val89Leu            | -                        |                                                                                       | unknown                                                                                                                                                 |
| <b>Control-C</b> | <i>dgt</i>             | No essential | 168117          | GA→G          | 24.05%    | Ile→fs       | p.Ile10fs             | HD(66-182)               | <a href="http://pfam.xfam.org/protein/P15723">http://pfam.xfam.org/protein/P15723</a> | dGTPase preferentially hydrolyzes dGTP over the other canonical NTPs                                                                                    |
